## Identification and characterization of vancomycin-resistant *Staphylococcus aureus* in hospital wastewaters: evidence of horizontal spread of antimicrobial resistance

Sneha Kalasseril Girijan and Devika Pillai\*

Department of Aquatic Animal Health Management, Kerala University of Fisheries and Ocean Studies, Kerala, India

\*Corresponding author. E-mail: devikamanoj.pillai@gmail.com

### ABSTRACT

Antibiotic resistance has become a major threat to human health around the world, but its spread through the aquatic environment has been often overlooked. This study aimed to determine the occurrence of vancomycin-resistant *Staphylococcus aureus* in hospital wastewaters and their transmission into public water bodies in Kerala, India. A total of 113 *S. aureus* were isolated from three hospital effluents in Kerala, India. Standard disc diffusion and the strip method were used for antibiotic susceptibility testing and minimum inhibitory concentration detection. Plasmid-mediated vancomycin resistance was confirmed by plasmid curing and conjugation; resistant genes were detected by the polymerase chain reaction (PCR). Nearly 76% of *S. aureus* isolates were resistant to  $\beta$ -lactams, chloramphenicol, macrolides, aminoglycosides, and glycopeptide class of antibiotics. Among the vancomycin-resistant *Staphylococcus aureus* (VRSA) isolates, the prevalence rates of *vanA* and *vanB* resistance-encoding genes were 46.5 and 59.3%, respectively. Through the broth mating method, *vanA* gene was successfully transferred from VRSA donor to vancomycin-sensitive *S. aureus*. The study strongly indicates the contamination of water bodies with antibiotic-resistant bacteria from hospital discharges, their dissemination and possible transfer to microbes in the aquatic environment, posing a serious threat for public health.

**Key words:** hospital effluent, multidrug resistance, *vanA*, *Staphylococcus aureus*, *vanB*

### HIGHLIGHTS

- High vancomycin resistance was observed in *S. aureus* isolates in the hospital effluent.
- Vancomycin-resistant *Staphylococcus aureus* (VRSA) isolates with *vanA* and *vanB* resistance-encoding genes have a higher chance of surviving in the sewage treatment plants.
- Horizontal transfer of the resistance gene was confirmed by conjugation.
- The VRSA isolates have a strong capacity to acquire or transfer antibiotic-resistant genes, posing a threat to public health.

### INTRODUCTION

*Staphylococcus aureus* is one of the most common microorganisms frequently associated with various diseases, ranging from mild infections of the skin to life-threatening endocarditis, chronic osteomyelitis, pneumonia, and bacteraemia (Lowy 1998; Murray 2005). During the mid-20th century, the introduction and use of antibiotics such as penicillin and methicillin proved successful against *S. aureus* infections. However, the bacterium quickly acquired resistance to these antibiotics posing an enormous challenge to both veterinary and human health clinicians (Brouillette & Malouin 2005). Treatment for this bacterium is a concern with the emergence and spread of penicillin-resistant *S. aureus* and in turn methicillin-resistant *S. aureus* (MRSA). MRSA has become one of the most common causes of hospital-associated and community-acquired infections, and the global spread of MRSA is a matter of great concern (Grundmann *et al.* 2006). Besides, community-based MRSA has recently emerged as a potential threat, causing infections in healthy individuals with no risk factors associated with healthcare (Kluytmans-Vandenbergh & Kluytmans 2006). The antibiotic glycopeptide vancomycin has proven effective in the treatment of serious MRSA infections (McGuinness *et al.* 2017). Moreover, in the last 20 years, *S. aureus* clinical isolates with reduced sensitivity to vancomycin and less frequently, with maximum resistance to vancomycin, have emerged (Hidayat *et al.* 2006).

This is an Open Access article distributed under the terms of the Creative Commons Attribution Licence (CC BY 4.0), which permits copying, adaptation and redistribution, provided the original work is properly cited (<http://creativecommons.org/licenses/by/4.0/>).

In 1958, vancomycin was clinically introduced to treat Gram-positive bacterial infections by inhibiting the incorporation of *N*-acetylglucosamine and *N*-acetylmuramic acid polypeptides into the growing chain of peptidoglycines. This process is interfered by D-Ala-D-Ala, which inhibits the release of terminal D-Ala and the formation of intrachain bonds. In *S. aureus*, two modes of resistance to vancomycin have been described. The first type observed in intermediate vancomycin resistance is the piling up of an additional layer of peptidoglycan where within the bacterial cell wall, many vancomycin molecules were trapped. The trapped molecules block the peptidoglycan lipid bilayer and eventually form a physical barrier to more incoming molecules of vancomycin (Chaudhari & Bajaj 2015). The second type identified in vancomycin resistance strains is the result of the acquisition of *vanA* gene cluster from *Enterococcus* spp. (Saha *et al.* 2008). In Enterococci, six types of van operons that confer glycopeptide resistance were identified based on the gene sequence and organization (Reynolds & Courvalin 2005). The different operons are named by the gene, which encodes either a D-Ala:D-Lac (*vanA*, *vanB*, and *vanD*) or a D-Ala:D-Ser (*vanC*, *vanE*, and *vanG*) ligase for the synthesis of lowest affinity peptidoglycan precursors for glycopeptides. The D-Ala:D-Lac ligase-coding operons include genes for a two-component regulatory system (*vanR* and *vanS*), three resistance genes (*vanH*, *vanA* or *vanB*, or *vanD*, and *vanX*), an additional gene (*vanY*), and other unknown functional genes (*vanW* or *vanZ*).

The use of antibiotics and the spread of antibiotic resistance in clinical settings are well-recognized issues but its environmental importance has been largely overlooked. It is the case in many nations, including those with large populations such as China and India, as well as in many countries in Africa and South America, where sales of antibiotics tend to have risen, in line with the rise of an affluent middle class (Taneja & Sharma 2019). Antibiotic resistance can emerge from mutations or the acquisition of resistance-encoding genes via horizontal gene transfer (HGT), with the latter being the most important factor in the current AMR pandemic.

Long-term exposure of microorganisms to low antibiotic concentration contributes to antibiotic resistance in pathogenic organisms. In addition, antibiotic residues existing in the hospital wastewater treatment plants and discharged through the hospital effluents increase the selection pressure; therefore, the normal microorganisms in the aquatic environment acquire resistance through different types of transfer mechanisms. These resistant bacteria spread not only in hospital wastewater, but also in municipal wastewater, urban water, and agricultural and aquaculture systems (Allen *et al.* 2010). The spread of antibiotic resistance plasmids in human pathogens is especially well studied and shows that once resistance genes have become established on successful plasmids, they may rapidly spread across different strains, species, or even genera. These genes are currently found in humans, animals, and the environment (Hartmann *et al.* 2012; Woerther *et al.* 2013). The transfer of plasmids in pathogens has been attributed to the worldwide dissemination of multiple ARGs encoding resistance to  $\beta$ -lactams, quinolones, aminoglycosides, tetracyclines, sulfonamides, and other drug classes, leading to the development of multidrug resistance.

In India, the hospital effluent is released into the municipal sewer system without any proper treatment (Mubedi *et al.* 2013). It is reported that India has a yearly revenue of USD45 billion from the pharmaceutical sector and ranks among the top five countries of the world with 25–300 pharmaceutical companies. India is also one of the greatest consumers of antibiotics. Antibiotic use has increased significantly in India over the last decade, with a 30% increase in per capita consumption. According to the Center for Disease Dynamics, Economics, and Policy (CDEEP) in Washington, the percentage change in total consumption between 2010 and 2020 has also been about 48% (Hindustan Times 2021). Recognizing this high rate of production and utilization, some studies suggest that 10–90% of the drug consumed is eliminated in its original form, while the rest is metabolized and/or conjugated (Kumari *et al.* 2020). The Central Pollution Control Board (CPCB), India, reported that out of 18.6% of total treatment capacity, only 13.5% of sewage is properly treated (CPCB 2017). According to Khan *et al.* (2019), the main methods of wastewater treatment used by Indian hospitals are conventional activated sludge and sand filtration. In a study conducted based on the efficiency of sewage treatment plants in South India, Prabhasankar *et al.* (2016) point out that, due to the improper treatment process, the treated hospital wastewater showed higher outlet concentrations of pharmaceutical compounds when compared with the domestic treatment plants.

Taking all these facts into consideration, we conducted a study of three direct hospital effluents to public water bodies in Kerala, India, which revealed the presence of vancomycin-resistant *S. aureus* in the samples. In particular, the study aimed to find out the sensitivity of these isolates to different antibiotics, the molecular characterization of vancomycin resistance-encoding genes, and the mode of transfer of these resistance genes by the conjugation method.

## METHODS

### Study area

Three prominent hospitals (H1, H2, and H3) located near water bodies in three districts of Kerala, India (Ernakulam, Kollam, and Kannur) were selected for the study. The study was conducted during August–December 2018–2019. All the hospitals mentioned in the study have a moving bed biofilm reactor (MBBR) system for sewage treatment. The hospitals released their sewage effluents into water bodies that were used for various purposes including inland fishing activities. There were no pharmaceutical industries adjacent to the water bodies.

### Sample collection and processing

Sediment and water samples were collected from the sampling points, following standard procedures. Water samples were taken from the outlet pipes of the hospitals in sterilized amber-coloured 500 ml glass bottles labelled as H1, H2, and H3 and transported to the laboratory on ice within 2 h of collection. Using an Ekman Dredge sediment sampler, sediment samples were also collected from the same three sites. From each site, approximately 100–200 g of the sediment sample was collected in 50 ml sterilized tubes. Ten-fold serial dilutions of surface water in 0.9% sterile saline (NaCl) solution were made. The entire sediment sample was dissolved in 100 ml of 0.9% normal saline, followed by subsequent 10-fold dilutions. The diluted samples were spread plated in duplicate plates of Trypticase soy agar (Himedia, India) and incubated at 37 °C for 24 h. Colonies were enumerated after incubation, and colonies with various morphologies were randomly selected and transferred at least three times in order to ensure their purity. Traditional biochemical tests were carried out to identify *S. aureus* isolates, including Gram staining, catalase, oxidase, coagulase, and mannitol utilization tests (Holt *et al.* 1994).

### Antimicrobial susceptibility testing and determination of minimum inhibitory concentration

The antibiotic resistance profile was determined by the agar diffusion method using 14 antibiotic discs (Bauer *et al.* 1966). Antibiotic resistance phenotypes were determined according to the guidelines of the Clinical and Laboratory Standards Institute (CLSI 2017). Overnight cultures of the bacterial isolates were plated on Mueller–Hinton agar. The following antibiotic discs were used for antimicrobial susceptibility testing: azithromycin (15 µg), ampicillin (10 µg), clindamycin (2 µg), clarithromycin (15 µg), chloramphenicol (30 µg), ciprofloxacin (5 µg), moxifloxacin (5 µg), erythromycin (15 µg), gentamicin (10 µg), methicillin (5 µg), oxacillin (1 µg), streptomycin (10 µg), trimethoprim (5 µg), and vancomycin (30 µg). The microdilution tube method using Mueller–Hinton broth (Himedia, India) was used for determining the minimum inhibitory concentration (MIC) of vancomycin with a concentration ranging from 2 to 1,064 µg/ml as recommended by the CLSI.

### Multiple antibiotic resistance index study

The multiple antibiotic resistance (MAR) index for each isolate was determined by dividing the number of antibiotics to which the organism was resistant by the total number of antibiotics tested (Kaplan *et al.* 2005). A general indication of the possible source of an organism is provided by the MAR index.

### Plasmid curing and isolation of plasmid

Plasmid curing was performed by growing the isolates that showed high resistance to vancomycin in nutrient broth (Himedia, India) containing 0.1 mg/ml acridine orange for 24 h (Chaudhari & Bajaj 2015). A loopful of broth was inoculated in vancomycin screening agar along with nutrient agar. Growth in both screening agar and nutrient agar indicates chromosomal resistance which is not cured, whereas growth only in nutrient agar shows plasmid-mediated resistance. For the complete confirmation of plasmid curing, 3–6 days of daily sub-culturing in both the agar is preferred. The bacterial plasmid was extracted in accordance with the manufacturer's instructions using a plasmid extraction kit (GeNei, Bangalore). The purified plasmid DNA was dissolved and stored at 4 °C in TE buffer.

### Transfer of vancomycin resistance by the broth mating procedure

Broth mating was performed as follows (Saha *et al.* 2008). In Luria–Bertani (LB) broth (Himedia, India), pure colonies of donor and recipient cells were inoculated separately and cultivated overnight at 37 °C with shaking. These overnight cultures were diluted in a fresh medium at 1:100 and each was grown to the early exponential phase. The mating combination was prepared by adding 0.1 ml of donor cells to 0.9 ml of recipient cells. The mixture was gently whirled for a few minutes, then incubated at 37 °C for 6 h (without shaking). This was followed by plating on LB agar medium (Himedia, India).

containing 16 µg/ml vancomycin and 2.5 µg/ml ciprofloxacin. After 48 and 72 h of incubation, colonies were counted. In addition, in the presence of vancomycin plus ciprofloxacin combination, donor and recipient cells were separately plated to assess their inability to grow because the donor was sensitive to ciprofloxacin and the recipient was susceptible to vancomycin.

### Molecular characterization of vancomycin resistance-encoding genes

The isolates that phenotypically showed resistance to vancomycin were screened to detect the presence of resistance-encoding genes using appropriate primers (Clark *et al.* 1993; Saha *et al.* 2008). Table 1 shows the details of the primers used and the polymerase chain reaction (PCR) conditions. The PCR was carried out in 25 µl reaction mixture containing 15.75 µl of nuclease-free water, 10× Taq buffer (2.5 µl) (100 mM Tris-HCl, pH 8.3, 20 mM MgCl<sub>2</sub>, 500 mM KCl, and 0.1% gelatin), 200 mM dNTPs (0.5 µl) (dATP, dTTP, dGTP, and dCTP), 10 pmol each of forward and reverse primers (2 µl), 1.0 unit of Taq DNA polymerase (0.25 µl), and 2 µl of the template. All the reagents were purchased from Origin Diagnostics and Research, Bangalore. The PCR was carried out in a My Cyclor thermal cycler (Bio-Rad, USA). The PCR products were purified and sequencing was performed with an automated ABI 3100 Genetic analyzer using the ABI BigDYE terminator method (M/s

**Table 1** | List of primers used for PCR amplification

| Specific gene for amplification | Primer  | Primer sequence (5'-3') | Amplicon size (bp) | PCR conditions                                                                                               | References                 |
|---------------------------------|---------|-------------------------|--------------------|--------------------------------------------------------------------------------------------------------------|----------------------------|
| <i>vanA</i>                     | Forward | ATGAATAGAATAAAAGTTGC    | 1,032 bp           | 98 °C/2 min – ID<br>98 °C/10 s – D<br>50 °C/1 min – A<br>72 °C/1 min – PE<br>72 °C/5 min – FE<br>Cycles – 35 | Saha <i>et al.</i> (2008)  |
|                                 | Reverse | TCACCCCTTTAACGCTAATA    |                    |                                                                                                              |                            |
| <i>vanB</i>                     | Forward | GTGACAAACCGGAGGCGAGGA   | 433 bp             | 95 °C/10 min<br>94 °C/30 s<br>58 °C/30 s<br>72 °C/30 s<br>72 °C/10 min<br>Cycles – 30                        | Clark <i>et al.</i> (1993) |
|                                 | Reverse | CCGCCATCCTCTGCAAAAAA    |                    |                                                                                                              |                            |
| <i>vanC</i>                     | Forward | GAAAGACAACAGGAAGACCGC   | 796 bp             | 95 °C/10 min<br>94 °C/30 s<br>58 °C/30 s<br>72 °C/30 s<br>72 °C/10 min<br>Cycles – 30                        | Clark <i>et al.</i> (1993) |
|                                 | Reverse | ATCGCATCACAAGCACCAATC   |                    |                                                                                                              |                            |
| <i>vanHAX</i>                   | Forward | ATGAATAACATCGGCATTAC    | 2.6 kb             | 98 °C/2 min<br>98 °C/10 s<br>50 °C/1 min<br>72 °C/1 min 30 s<br>72 °C/5 min<br>Cycles – 35                   | Saha <i>et al.</i> (2008)  |
|                                 | Reverse | TTATTTAACGGGAAATC       |                    |                                                                                                              |                            |
| <i>vanH</i>                     | Forward | ATGAATAACATCGGCATTAC    | 969 bp             | 98 °C/2 min<br>98 °C/10 s<br>50 °C/1 min<br>72 °C/1 min<br>72 °C/5 min<br>Cycles – 35                        | Saha <i>et al.</i> (2008)  |
|                                 | Reverse | CTATTTCATGCTCTGTCTCC    |                    |                                                                                                              |                            |
| <i>vanX</i>                     | Forward | ATGGAAATAGGATTTACTTT    | 609 bp             | 98 °C/2 min<br>98 °C/10 s<br>50 °C/1 min<br>72 °C/30 s<br>72 °C/5 min<br>Cycles – 35                         | Saha <i>et al.</i> (2008)  |
|                                 | Reverse | TTATTTAACGGGAAATC       |                    |                                                                                                              |                            |

ID, initial denaturation; D, denaturation; A, annealing; PE, primer extension; FE, final.

Agrigenome Pvt Ltd, Kochi). A BLAST algorithm was used to analyse the nucleotide sequences (<https://www.ncbi.nlm.nih.gov/BLAST>).

## RESULTS

### Identification and characterization

Samples were collected from three direct hospital effluent discharge sites located in the north, central, and south districts of the state and screened for the presence of drug-resistant bacterial pathogens. From the collected hospital effluent samples, a total of 113 *S. aureus* (69.75%) isolates were identified from the sediment, water and fish/shellfish samples screened (H1 = 59, H2 = 37, H3 = 17). The number of cultivable bacteria in the H1 samples was much higher than that in the H2 and H3 samples. The results of culture on mannitol salt agar showed that all the *S. aureus* isolates produce positive results for fermentation of mannitol, changing the colour from red to yellow. The occurrence and distribution of multidrug-resistant *S. aureus* from different locations is shown in Table 2.

### Antibiotic susceptibility testing, determination of MIC, and MAR index analysis of selected isolates

The pattern of antibiotic resistance among *S. aureus* strains varied in samples collected from different discharge points. On initial testing, the growth of *S. aureus* isolates on the MHA screen agar plate with 32–64 µg/ml of vancomycin indicated possible resistance to vancomycin since no inhibition zone was noted around the vancomycin disc. The highest number of isolates was obtained from the H1 site ( $n = 59$ ). Among them, 48 isolates were found to be resistant to several antibiotics, such as amoxicillin, ampicillin, azithromycin, clindamycin, clarithromycin, chloramphenicol, ciprofloxacin, erythromycin, methicillin, oxacillin, streptomycin, and vancomycin. However, all the isolates were susceptible to gentamicin and ciprofloxacin as determined by the disc diffusion test. Twenty-eight *S. aureus* from H2 discharge points ( $n = 37$ ) and 10 isolates from H3 ( $n = 17$ ) were resistant to almost all classes of antibiotics similar to H1 isolates. The antimicrobial susceptibility pattern of multidrug-resistant *S. aureus* isolated from direct hospital effluents is illustrated in Table 3.

The MICs of vancomycin for *S. aureus* isolates from different hospital discharge points were found to be 64–128 µg/ml, confirmed as vancomycin-resistant *Staphylococcus aureus* (VRSA) according to CLSI criteria. However, the MIC value increased to 1,024 µg/ml after sub-culturing the isolates in the presence of vancomycin. The 23 *S. aureus* isolates from the H1 discharge point were highly resistant to vancomycin and teicoplanin with MIC values ranging from 32 to 128 µg/ml. The 11 VRSA isolates from H2 and two isolates from H3 showed MIC values for vancomycin ranging from 32 to 64 µg/ml; among them, three isolates from H2 were resistant to teicoplanin also. The remaining isolates from H3 showed intermediate resistance to vancomycin with the MIC value of 16 µg/ml. An MAR index revealed that all the multidrug-resistant isolates had a high MAR index value of >0.9. These results confirmed that the selected isolates have originated from a clinically high risk source of contamination.

### Molecular characterization of vancomycin resistance-encoding genes

A total of 86 (H1 = 48, H2 = 28, H3 = 10) VRSA isolates from the selected sites were screened for vancomycin resistance-encoding genes. The extracted plasmid was used as a template for PCR amplification of *vanHAX*, *vanH*, *vanA*, *vanB*, *vanC*, *vanX*, and *mecA* with appropriate primers. Amplicons of 1,032 bp for *vanA* (Figure 1) and 433 bp for *vanB* (Figure 2) were obtained by the PCR. Among the 86 VRSA isolates, 27 isolates from H1 and 13 isolates from H2 showed the existence of

**Table 2** | Occurrence of VRSA from direct hospital effluent samples

| Source         | Total number of isolates | Types of samples                                         | Total number of VRSA isolates | <i>vanA</i> -positive isolates | <i>vanB</i> -positive isolates |
|----------------|--------------------------|----------------------------------------------------------|-------------------------------|--------------------------------|--------------------------------|
| Ernakulam (H1) | 59                       | Hospital effluents ( $n = 42$ )<br>Sediment ( $n = 17$ ) | 48                            | 27                             | 32                             |
| Kollam (H2)    | 37                       | Hospital effluent ( $n = 28$ )<br>Sediment ( $n = 9$ )   | 28                            | 13                             | 19                             |
| Kannur (H3)    | 17                       | Hospital effluent ( $n = 11$ )<br>Sediment ( $n = 6$ )   | 10                            | Nil                            | Nil                            |

**Table 3** | Antimicrobial susceptibility pattern of multidrug-resistant *S. aureus* isolated from direct hospital effluents

| Antibiotics     | Number of isolates showed resistance towards antibiotics |                     |                     |
|-----------------|----------------------------------------------------------|---------------------|---------------------|
|                 | H1 samples (n = 59)                                      | H2 samples (n = 37) | H3 samples (n = 17) |
| Azithromycin    | 48                                                       | 28                  | 10                  |
| Ampicillin      | 48                                                       | 28                  | 10                  |
| Clindamycin     | 48                                                       | 20                  | 8                   |
| Clarithromycin  | 40                                                       | 18                  | 7                   |
| Chloramphenicol | 39                                                       | 21                  | 10                  |
| Ciprofloxacin   | 0                                                        | 0                   | 0                   |
| Moxifloxacin    | 48                                                       | 23                  | 5                   |
| Erythromycin    | 36                                                       | 28                  | 6                   |
| Gentamicin      | 0                                                        | 0                   | 0                   |
| Methicillin     | 48                                                       | 28                  | 10                  |
| Oxacillin       | 48                                                       | 28                  | 10                  |
| Streptomycin    | 40                                                       | 21                  | 9                   |
| Trimethoprim    | 41                                                       | 26                  | 8                   |
| Vancomycin      | 48                                                       | 28                  | 10                  |

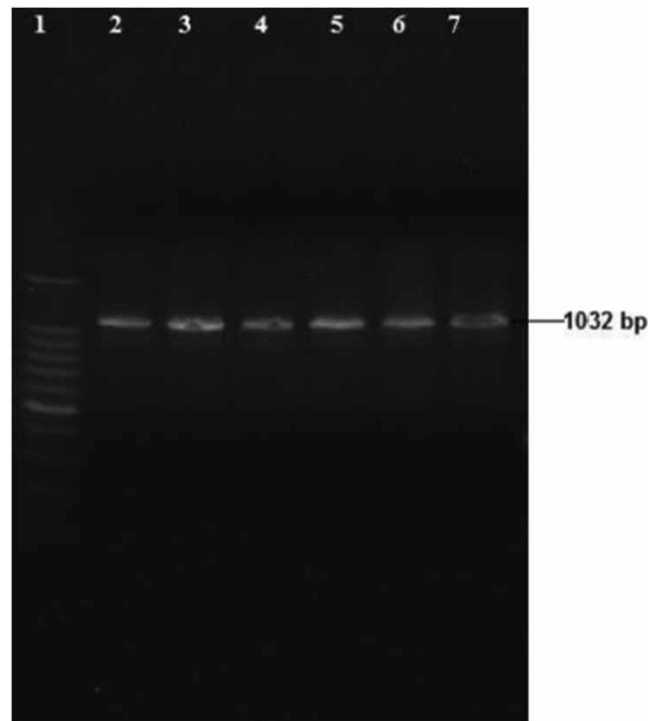**Figure 1** | Amplification of *vanA* gene with 1,032 bp amplicon size product; lane 1: 100 bp molecular weight marker, lanes 2–5, samples from Ernakulam (H1); lanes 6–7: samples from Kollam (H2).

*vanA* gene. The number of *vanB*-positive isolates was 32 in H1 and 19 in H2, whereas none of the phenotypically resistant VRSA isolates from H3 harboured either *vanA* or *vanB* genes. Most of the *vanB*-positive isolates from the direct hospital effluent co-harboured *vanA* gene also.

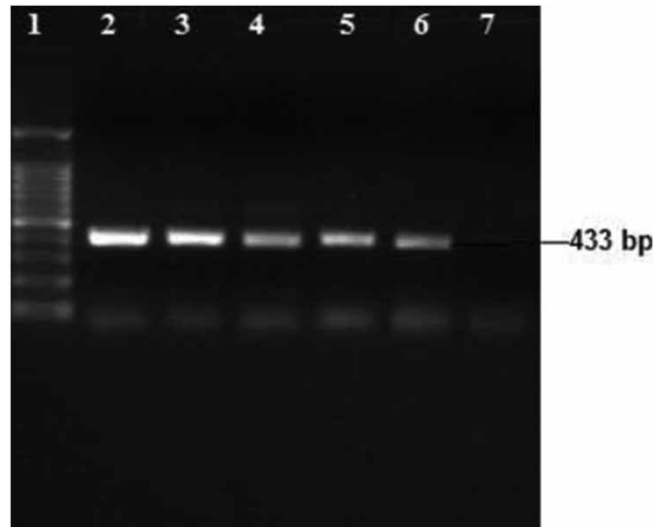

**Figure 2** | Amplification of *vanB* gene with 433 bp amplicon size product; lane 1: 100 bp molecular weight marker, lanes 2–4: samples from Ernakulam (H1); lanes 5–6: samples from Kollam (H2).

### Plasmid analysis and transfer of vancomycin resistance-encoding genes

The plasmid profile analysis of VRSA isolates revealed that most of them carried three to four plasmids with different molecular weights ranging from 51.2, 5.5, 5.1 and 1.5 kb. The plasmid-mediated *vanA* gene was successfully transferred from donor to recipient *S. aureus* isolate by conjugation. Twenty-eight transconjugant colonies were found on LB agar with appropriate selective antibiotics, and no growth was observed in the selective medium of recipient and donor *S. aureus* when inoculated separately. The MIC of transconjugant was found to be 32 µg/ml.

### Plasmid curing

Plasmid curing was performed with nine VRSA isolates that showed the presence of *vanA* gene. Following 3–6 days of daily sub-culturing, an examination of the phenotypically resistance status showed that seven plasmids cured VRSA isolates lost one large plasmid of 50 kb size and these isolates became sensitive to glycopeptide as well as macrolide classes of antibiotics.

## DISCUSSION

In this study, 113 multidrug-resistant *S. aureus* isolates were recovered from different hospital discharge points, clearly pointing to the improper treatment of the effluent in these hospitals. Even though all the three hospitals had an MBBR system for effluent treatment in place, it was either dysfunctional or not being used. Several studies have shown that hospitals are one of the major contributors to the emergence and dissemination of multidrug-resistant bacteria into surrounding aquatic environments (ARB) (Kalasseril *et al.* 2020) and the dissemination of these isolates is greatly influenced by the antibiotic policies of a particular country such as the manufacture of antibiotics, the dispensation of antibiotics, and inappropriate and incorrect dosing of antibiotics (Manyi-Loh *et al.* 2018). Analysing the findings of previous studies showed that one of the key routes leading to the dissemination of ARB into the environment might be hospital wastewater treatment plants (WWTPs) as suggested by Szczepanowski *et al.* (2009).

The concern about environmental antibiotic pollution in general and that of aquatic ecosystems in particular is increasing worldwide. Effluents from hospitals and even wastewater treatment plants are an important source for the release of antibiotics and antibiotic-resistant bacteria into the environment. Kummerer (2009) concluded that globally ‘antibiotics are released in hospital wastewater continuously, daily, and all year round’. The aquatic environment, in particular, can act as a natural reservoir of antibiotic resistance as well as a route for the dissemination of clinical resistance traits (Michael *et al.* 2013). Due to the improper waste management, large amounts of antibiotics may be released into hospital wastewater due to the excretion of antibiotics used and the incorrect disposal of unused compounds, which can later be released into the environment. The hospital effluents contain a wide range of compounds used for medical, laboratory, and research purposes, as well as human excreta (Biobooster 2016). These biological active compounds are insoluble/soluble organic/inorganic

pollutants that have a harmful effect on people and aquatic animals even at extremely low concentrations. Pathogenic microbes such as viruses, bacteria, fungi, protozoans, and helminths are also found in these effluents (Santoro *et al.* 2015). Studies have shown that once the antibiotics reach the aquatic environment, due to their slow biodegradation, some of these drugs may persist in the environment for longer time due to bioaccumulation and biomagnification. Antibiotics in the natural environment, even in low quantities, can affect the survival, reproduction, and metabolism of aquatic organisms, as well as alter the structure of communities and ecosystem functions (Pereira *et al.* 2015; Martin-Laurent *et al.* 2019).

Kerala, India's southernmost state, is bordered on the east by the Western Ghats and on the west by the Lakshadweep Sea. The state comprises of 14 districts. Kerala is considered a pharmaceutical consumer state, with a total drug consumption of over 20,000 crores per year, and antibiotics contributing for 20% of the total drugs taken annually in the state. Although there are regulations for effluent discharge in the state, there appears to be a lack of strict implementation of these regulations and thus, most WWTP units have not been fully functional (The Times of India Report 2018; The New Indian Express 2020), as also indicated by the results obtained in the present study. The wastewater from these systems can easily contaminate the environment, allowing multidrug-resistant bacteria to spread. Extreme temperatures and high relative humidity lead to the survival of such superbugs in hospitals and the emergence of new ones in the environment, which could pose an occupational and food threat not only to fishermen and farmers, but ultimately to the wider population. The Government of Kerala has initiated the Antibiotic Stewardship Program (ASP) to regulate and promote the judicious use of antibiotics in all sectors as part of the 'One-Health' Programme (KARSAP 2018).

The presence and survival of *S. aureus* in the hospital wastewater discharge, observed in the present study, is thus, not too surprising. Thompson *et al.* (2013) reported similar results, observing elevated levels of antibiotic-resistant *S. aureus* in untreated hospital wastewaters and receiving sewage treatment plant of a metropolitan hospital in Australia. Antibiotic resistance among pathogenic bacteria is a well-documented phenomenon which has significant consequences for the treatment of infections. *S. aureus* has a unique ability to respond rapidly to any new antibiotic by developing a resistance mechanism from penicillin and methicillin to the most recent linezolid and daptomycin (Kaur & Chate 2015). Our findings were comparable with other studies which also found high levels of antibiotic resistance among *S. aureus* isolated from hospital wastewaters in Australia, North Europe and clinical samples in Damascus (Ali *et al.* 2014). Interestingly, similar to the findings obtained in our study, Saha *et al.* (2008) had earlier reported that the *S. aureus* isolated from an Indian hospital showed 100% tolerance to ampicillin, chloramphenicol, and erythromycin, but was susceptible to ciprofloxacin and gentamicin.

According to the Clinical and Laboratory Standards Institute, *S. aureus* isolates for which vancomycin MIC is 4–8 µg/ml are classified as vancomycin-intermediate (VISA), and isolates for which vancomycin MICs are greater than 8 µg/ml are classified as vancomycin-resistant isolates (VRSA). The MIC of vancomycin for VRSA isolates from different hospital discharge points was found to be 64–128 µg/ml. However, the MIC value increased to 1,024 µg/ml after sub-culturing the isolates in the presence of vancomycin which indicate that *S. aureus* isolates were becoming increasingly resistant to vancomycin compared with earlier reports (Ramana & Chaudhury 2012). This is a matter of serious concern and may pose a major problem with its use as the main drug against MRSA infections. MAR index studies revealed that all the multidrug-resistant isolates had a high MAR index value of >0.9. These results indicated that the isolates have originated from a clinically high risk source of contamination where antibiotics are often used and possibly abused, which is similar to many findings from other parts of the world (Habibi *et al.* 2008).

Of the six major phenotypes of vancomycin resistance, phenotypes of *vanA* and *vanB* are both common and transferable. The *vanA* phenotype is highly resistant to vancomycin and teicoplanin, while *vanB* phenotype has variable levels of vancomycin resistance, but not teicoplanin. We found both the vancomycin encoding genes, *vanA* and *vanB*, in our study among 86 VRSA isolates which showed complete resistance to vancomycin. Chang *et al.* (2003) reported a clinical isolate of vancomycin-resistant *S. aureus* with the presence of *vanA* resistance-encoding gene that showed a high MIC value of 1,024 µg/ml for vancomycin isolated in United States. In India, Chakraborty *et al.* (2011) also found that VRSA strains which harboured both *vanA* and *vanB* genes showed complete resistance to vancomycin.

Besides, a small percentage (31.3%) of phenotypically resistant isolates did not have any common VAN resistance mechanisms. In the present study, some of the VRSA and VISA strains were negative for vancomycin resistance-encoding genes by the PCR. However, the absence of these genes in the present isolates does not rule out that these strains are not VRSA or VISA. There is another hypothesis that proposes that the thickening of cell walls is responsible for the development of vancomycin resistance. The vancomycin resistance mechanism has been studied extensively with the first clinical VRSA strain, Mu50 (Hanaki *et al.* 1998; Cui *et al.* 2000). Examination of the Mu50 cell by the biochemical test and transmission electron



microscopy indicated that it contains increased levels of peptidoglycan. Vancomycin-resistant staphylococci with thickening of cell walls were also demonstrated by Palazzo *et al.* (2005). The thickened cell wall of VRSA becomes thinner with the loss of vancomycin through sub-culturing in the absence of antibiotics. This may be the possible mechanism behind the vancomycin-resistant staphylococcal isolates that we identified, even though we were unable to perform the test for cell wall thickening demonstration in these isolates.

Vancomycin resistance was successfully transferred from *S. aureus* with the *vanA* gene to vancomycin-sensitive *S. aureus* by the broth mating procedure. *vanA* genes are located on mobile plasmids which can promote the transfer of this gene between different bacterial groups. The *vanA*, pheromone-responsive conjugative plasmids, are anticipated to be critical for the occurrence of VRSA. The presence of sex pheromone in *S. aureus*, which promotes plasmid transfer in *Enterococcus* spp., was further demonstrated by Showsh *et al.* (2001). The *vanA* phenotype can be transferred to other MRSA strains and through microbial species, with significantly greater potential for spread, even without vancomycin (Hageman *et al.* 2006). However, the detection of VRSA isolates with *vanA* and *vanB* genes in public water bodies in our study indicates that there is high possibility of the intrageneric transfer of vancomycin resistance from *S. aureus* strain to another.

Plasmid curing was performed with nine VRSA isolates that showed the presence of *vanA* gene. Following 3–6 weeks of daily sub-culturing, an examination of the phenotypically resistance status showed that seven plasmids cured VRSA isolates lost one large plasmid of 50 kb size and these isolates became sensitive to glycopeptide as well as macrolide classes of antibiotics. It has been suggested that high levels of glycopeptides, vancomycin, and teicoplanin resistance are mediated by the *vanA* type that may be chromosomally or plasmid located (Perichon & Courvalin 2000). The results obtained agree with the study by Shriram *et al.* (2013) who proved that vancomycin resistance was mainly plasmid mediated as they became sensitive to low antibiotic concentrations after plasmid curing (Shriram *et al.* 2013).

## CONCLUSION

The data obtained in this study showed the presence of multidrug-resistant *S. aureus* isolates with resistance-encoding genes in public water bodies illustrating the possible spread of bacterial pathogens from direct hospital wastewaters into natural environments. This study also points to a deeper systemic issue for a state like Kerala, where hospitals are main hotspots for resistant bacteria and its dissemination. A large number of strains was found in samples collected from the direct hospital effluent indicating their survival in the treatment plants. This study demonstrates the urgent need for the effective use of wastewater treatment plants in hospitals as part of ASPs to allow the constant monitoring of hospital wastewater discharges for the presence of antibiotic residues and antibiotic-resistant bacteria into natural aquatic environment.

## ACKNOWLEDGEMENT

The authors wish to thank the authorities of the Kerala University of Fisheries and Ocean Studies for providing facilities to carry out the work.

## CONFLICT OF INTEREST

On behalf of all authors, the corresponding author states that there is no conflict of interest.

## FUNDING STATEMENT

No external funding was received.

## DATA AVAILABILITY STATEMENT

All relevant data are included in the paper or its Supplementary Information.

## REFERENCES

- Ali, R., Al-Achkar, K., Al-Mariri, A. & Safi, M. 2014 Role of polymerase chain reaction (PCR) in the detection of antibiotic-resistant *Staphylococcus aureus*. *Egypt. J. Med. Hum. Genet.* **15** (3), 293–298.
- Allen, H. K., Donato, J., Wang, H. H., Cloud-Hansen, K. A., Davies, J. & Handelsman, J. 2010 Call of the wild: antibiotic resistance genes in natural environments. *Nat. Rev. Microbiol.* **8** (4), 251–259.
- Bauer, A. W., Kirby, W. M., Sherris, J. C. & Turck, M. 1966 Antibiotic susceptibility testing by standardized single disc method. *Am. J. Clin. Pathol.* **45**, 149–158.

- Biobooster, G. 2016 *Full Scale Advanced Wastewater Treatment at Herlev Hospital*. Report Prepared by DHI.
- Brouillette, E. & Malouin, F. 2005 The pathogenesis and control of *Staphylococcus aureus*-induced mastitis: study models in the mouse. *Microbes Infect.* **7** (3), 560–568.
- Chakraborty, S. P., Mahapatra, S. K., Bal, M. & Roy, S. 2011 Isolation and identification of vancomycin resistant *Staphylococcus aureus* from post-operative pus sample. *Al Ameen J. Med. Sci.* **4** (2), 152–168.
- Chang, S., Sievert, D. M., Hageman, J. C., Boulton, M. L., Tenover, F. C., Downes, F. P., Shah, S., Rudrik, J. T., Pupp, G. R., Brown, W. J. & Cardo, D. 2003 Infection with vancomycin-resistant *staphylococcus aureus* containing the vanA resistance gene. *N. Engl. J. Med.* **348** (14), 1342–1347.
- Chaudhari, K. & Bajaj, H. K. 2015 Plasmid mediated methicillin and vancomycin resistant *staphylococcus aureus* isolated from northern India. *J. Agric. Biol. Sci.* **10** (3), 92–96.
- Clark, N. C., Cooksey, R. C., Hill, B. C., Swenson, J. M. & Tenover, F. C. 1993 Characterization of glycopeptide-resistant Enterococci from U.S. hospitals. *Antimicrob. Agents Chemother.* **37** (11), 2311–2317.
- Clinical and Laboratory Standard Institute 2017 Performance standards for antimicrobial susceptibility testing. In: *In 26th Informational Supplement*. Clinical and Laboratory Standard Institute, Wayne, PA, USA.
- CPCB 2017 Status of STPs. Available from: <https://cpcb.nic.in/status-of-stps/>.
- Cui, L., Murakami, H., Kuwahara-Arai, K., Hanaki, H. & Hiramatsu, K. 2000 Contribution of a thickened cell wall and its glutamine nonamidated component to the vancomycin resistance expressed by *Staphylococcus aureus* mu50. *J. Antimicrob. Chemother.* **44** (9), 2276–2285.
- Grundmann, H., Aires-de-sousa, M., Boyce, J. & Tiemersma, E. 2006 Emergence and resurgence of methicillin-resistant *Staphylococcus aureus* as a public-health threat. *Lancet* **368** (9538), 874–885.
- Habibi, S., Wig, N., Agarwal, S., Sharma, S. K., Lodha, R., Pandey, R. M. & Kapil, A. 2008 Epidemiology of nosocomial infections in medicine intensive care unit at a tertiary care hospital in northern India. *Trop. Doct.* **38** (4), 233–235.
- Hageman, J. C., Patel, J., Carey, R., Tenover, F. C. & McDonald, L. C. 2006 Investigation and control of vancomycin-intermediate and resistant *Staphylococcus aureus*: a guide for Health Departments and Infection Control Personnel, Atlanta.
- Hanaki, H., Kuwahara-Arai, K., Boyle-Vavra, S., Daum, R. S., Labischinski, H. & Hiramatsu, K. 1998 Activated cell-wall synthesis is associated with vancomycin resistance in methicillin-resistant *Staphylococcus aureus* clinical strains Mu3 and mu50. *J. Antimicrob. Chemother.* **42** (2), 199–209.
- Hartmann, A., Locatelli, A., Amoureux, L., Depret, G., Jolivet, C., Gueneau, E. & Neuwirth, C. 2012 Occurrence of CTX-M producing *Escherichia coli* in soils, cattle, and farm environment in France (Burgundy Region). *Front. Microbiol.* **3**, 83.
- Hidayat, L. K., Hsu, D. I., Quist, R., Shriner, K. A. & Wong-Beringer, A. 2006 High-dose vancomycin therapy for methicillin-resistant *Staphylococcus aureus* infections: efficacy and toxicity. *Arch. Intern. Med.* **166** (19), 2138–2144.
- Holt, J. G., Krieg, N. R., Sneath, P. H. A., Staley, J. T. & Williams, S. T. 1994 *Bergey's Manual of Determinative Bacteriology*, 9th edn. Williams & Wilkins, Baltimore, MD.
- Kalasseril, S. G., Krishnan, R., Vattiringal, R. K., Paul, R., Mathew, P. & Pillai, D. 2020 Detection of New Delhi metallo- $\beta$ -lactamase 1 and cephalosporin resistance genes among carbapenem-resistant Enterobacteriaceae in water bodies adjacent to hospitals in India. *Curr. Microbiol.* **77** (10), 2886–2895.
- Kanth, A. 2020 *Kerala Dumps 94% Sewage in the Open Every day*. The New Indian Express Reports.
- Kaplan, S. L., Hulten, K. G., Gonzalez, B. E., Hammerman, W. A., Lamberth, L., Versalovic, J. & Mason, E. O. J. 2005 Treatment of *Staphylococcus aureus* bacteremia in children. *Clin. Infect. Dis.* **40**, 1785–1791.
- Kaul, R. 2021 *Antibiotic Intake in India Rises by 30% in A Decade, Says Report*. The Hindustan Times.
- Kaur, D. C. & Chate, S. S. 2015 Study of antibiotic resistance pattern in methicillin resistant *Staphylococcus aureus* with special reference to newer antibiotic. *J. Glob. Infect. Dis.* **7** (2), 78.
- Kerala Antimicrobial Resistance Strategic Action Plan (KARSAP) 2018 One Health Response to AMR Containment. Jointly developed by the Departments of Agriculture Development & Farmers Welfare, Animal Husbandry, Environment, Fisheries and Health & Family Welfare. *Government of Kerala*, October.
- Khan, N. A., Ahmed, S., Vambol, S., Vambol, V. & Farooqi, I. H. 2019 Field hospital wastewater treatment scenario. *Ecol. Quest.* **30** (3), 57–69.
- Kluytmans-Vandenbergh, M. F. Q. & Kluytmans, J. A. J. W. 2006 Community-acquired methicillin-resistant *Staphylococcus aureus*: current perspectives. *Clin. Microbiol. Infect.* **12**, 9–15.
- Kumar, M. K. S. 2018 *Raw Sewage Flowing out From Hospital*. The Times of India Reports.
- Kumari, A., Maurya, N. S. & Tiwari, B. 2020 Hospital wastewater treatment scenario around the globe. *Curr. Develop. Biotechnol. Bioeng.* **15**, 549–570.
- Kummerer, K. 2009 Antibiotics in the aquatic environment – a review – part II. *Chemosphere.* **75** (4), 435–441.
- Lowy, F. D. 1998 *Staphylococcus aureus* infections. *N. Engl. J. Med.* **339** (8), 520–532.
- Manyi-Loh, C., Mamphweli, S., Meyer, E. & Okoh, A. 2018 Antibiotic use in agriculture and its consequential resistance in environmental sources: potential public health implications. *Molecules* **23** (40), 795.
- Martin-Laurent, F., Topp, E., Billet, L., Batisson, I., Malandain, C., Besse-Hoggan, P., Morin, S., Artigas, J., Bonnineau, C., Kergoat, L. & Devers-Lamrani, M. 2019 Environmental risk assessment of antibiotics in agroecosystems: ecotoxicological effects on aquatic microbial

- communities and dissemination of antimicrobial resistances and antibiotic biodegradation potential along the soil-water continuum. *Environ. Sci. Pollut. Res.* **26** (18), 18930–18937.
- McGuinness, W. A., Malachowa, N. & DeLaeo, F. R. 2017 Focus: infectious diseases: vancomycin resistance in *Staphylococcus aureus*. *Yale J. Biol. Med.* **90** (2), 269–281.
- Michael, I., Rizzo, L., McArdell, C. S., Manaia, C. M., Merlin, C., Schwartz, T., Dagot, C. & Fatta-Kassinos, D. J. 2013 Urban waste water treatment plants as hotspots for the release of antibiotics in the environment: a review. *Water Res.* **47** (3), 957–993.
- Mubedi, J. I., Devarajan, N., Le Faucheur, S., Mputu, J. K., Atibu, E. K., Sivalingam, P., Prabakar, K., Mpiana, P. T., Wildi, W. & Pote, J. 2013 Effects of untreated hospital effluents on the accumulation of toxic metals in sediments of receiving system under tropical conditions: case of South India and Democratic Republic of Congo. *Chemosphere* **93** (6), 1070–1076.
- Murray, R. J. 2005 Recognition and management of *Staphylococcus aureus* toxin-mediated disease. *Intern. Med. J.* **35**, S106–S119.
- Palazzo, I. C., Araujo, M. L. & Darini, A. L. 2005 First report of vancomycin-resistant *Staphylococci* isolated from healthy carriers in Brazil. *J. Clin. Microbiol.* **43** (1), 179–185.
- Pereira, L. C., de Souza, A. O., Bernardes, M. F., Pazin, M., Tasso, M. J., Pereira, P. H. & Dorta, D. J. 2015 A perspective on the potential risks of emerging contaminants to human and environmental health. *Environ. Sci. Pollut. Res.* **22** (18), 13800–13823.
- Perichon, B. & Courvalin, P. 2000 Updates on vancomycin resistance. *Int. J. Clin. Pract. Suppl.* **54** (4), 250–254.
- Prabhasankar, V. P., Joshua, D. I., Balakrishna, K., Siddiqui, I. F., Taniyasu, S., Yamashita, N., Kannan, K., Akiba, M., Praveenkumarreddy, Y. & Guruge, K. S. 2016 Removal rates of antibiotics in four sewage treatment plants in South India. *Environ. Sci. Pollut. Res.* **23** (9), 8679–8685.
- Ramana, B. V. & Chaudhury, A. 2012 Rising incidence of high MIC for vancomycin among *Staphylococcus aureus* strains at a tertiary care hospital in South India. *J. Pharm. Bioallied Sci.* **4** (2), 173.
- Reynolds, P. E. & Courvalin, P. 2005 Vancomycin resistance in Enterococci due to synthesis of precursors terminating in D-alanyl-D-serine. *Antimicrob. Agents Chemother.* **49** (1), 21–25.
- Saha, B., Singh, A. K., Ghosh, A. & Bal, M. 2008 Identification and characterization of a vancomycin resistant *Staphylococcus aureus* isolated from Kolkata (South Asia). *J. Med. Microbiol.* **57** (1), 72–79.
- Santoro, D. O., Cardoso, A. M., Coutinho, F. H., Pinto, L. H., Vieira, R. P., Albano, R. M. & Clementino, M. M. 2015 Diversity and antibiotic resistance profiles of *Pseudomonads* from a hospital wastewater treatment plant. *J. Appl. Microbiol.* **119** (6), 1527–1540.
- Showsh, S. A., De Boever, R. H. & Clewell, D. B. 2001 Vancomycin resistance plasmid in *Enterococcus faecalis* that encodes sensitivity to a sex pheromone also produced by *Staphylococcus aureus*. *Antimicrob. Agents Chemother.* **45** (7), 2177–2178.
- Shriram, V., Kumar, V., Mulla, J. & Latha, C. 2013 Curing of plasmid-mediated antibiotic resistance in multi-drug resistant pathogens using *Alpinia galanga* rhizome extract. *Adv. Biotechnol.* **13**, 1–5.
- Szczepanowski, R., Linke, B., Krahn, I., Gartemann, K. H., Gutzkow, T., Eichler, W., Puhler, A. & Schluter, A. 2009 Detection of 140 clinically relevant antibiotic-resistance genes in the plasmid metagenome of wastewater treatment plant bacteria showing reduced susceptibility to selected antibiotics. *Microbiology* **155** (7), 2306–2319.
- Taneja, N. & Sharma, M. 2019 Antimicrobial resistance in the environment: the Indian scenario. *Indian J. Med. Res.* **149** (2), 119.
- Thompson, J. M., Gundogdu, A., Stratton, H. M. & Katouli, M. 2013 Antibiotic resistant *Staphylococcus aureus* in hospital wastewaters and sewage treatment plants with special reference to methicillin-resistant *Staphylococcus aureus* (MRSA). *J. Appl. Microbiol.* **114** (1), 44–54.
- Woerther, P. L., Burdet, C., Chachaty, E. & Andremont, A. 2013 Trends in human fecal carriage of extended-spectrum  $\beta$ -lactamases in the community: toward the globalization of CTX-M. *Clin. Microbiol. Rev.* **26** (4), 744–758.

First received 14 May 2021; accepted in revised form 3 September 2021. Available online 17 September 2021
